# Supplementary material
Source: HighWire-hosted journal article supplement (http://thorax.bmjjournals.com/highwire/filestream/174130/field_highwire_adjunct_files/2/JBSupplementary_Figure1.pdf)
Supplement: JBSupplementary_Figure1.pdf [file JBSupplementary_Figure1.pdf]

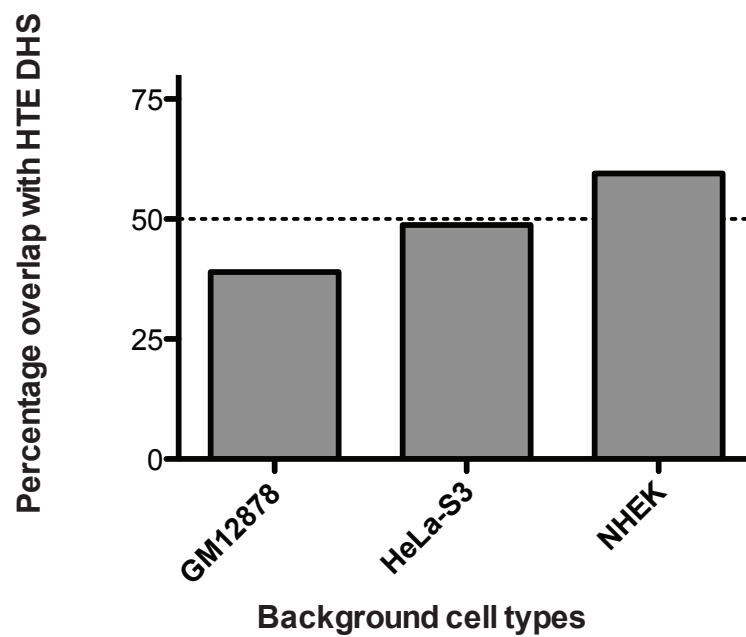

**Supplementary Figure 1.** Cell-type specificity of DNase I hypersensitive sites (DHS) in HTE cells. The genomic overlap between DHS in HTE and NHEK cells measured as the percentage of HTE DHS that overlap with each of the individual background cell types. Also shown are GM12878 and HeLa-S3 for comparison.
